# Supplementary material for: Ontogeny of the Cytochrome P450 Superfamily in the Ornate Spiny Lobster (Panulirus ornatus)
Source: MDPI journal article supplement (doi:10.3390/ijms25021070), 2024-01-15
Supplement: s1 [file s1]

**Table S1.** CYP450 expression across the 52 tissue libraries of juvenile and adult *Panulirus ornatus*. Tissues were collected from 1 male (first box of each tissue) and 1 female (second box of each tissue) except for testes (3 juveniles, 3 adults), sperm duct (3 regions from one adult male) ovaries (3 juveniles, 3 adults), oviduct (one adult female), hepatopancreas (2 juvenile males, 3 adult males, 3 juvenile females, 3 adult males). Transcripts ordered according to expression similarities across tissues. ES (eye stalk), Br (brain), TG (thoracic ganglia), Ant (antennal gland), Ts (testes), SD (sperm duct), Ov (ovary), M Hp (male hepatopancreas), F Hp (female hepatopancreas), G (gill), He (heart), Md (midgut), Hd (hindgut), Ms (muscle), Ep (epidermis), Ft (Fat), H (hemolymph). Shades of blue indicate expression levels, ranging from light blue (low expression) to the darkest blue (highest expression), represented as RPKM.

[illegible]

[illegible]

[illegible]
